# Supplementary material for: Complement Factor D Is a Novel Biomarker and Putative Therapeutic Target in Cutaneous Squamous Cell Carcinoma
Source: Cancers (Basel). 2022 Jan 8;14(2):305. doi: 10.3390/cancers14020305 (PMC8773783; doi:10.3390/cancers14020305)
Supplement: Supplementary file 1 [file cancers-14-00305-s001.zip › cancers-1516781-supplementary.pdf]

# **Complement Factor D Is a Novel Biomarker and Putative Therapeutic Target in Cutaneous Squamous Cell Carcinoma**

**Pegah Rahmati Nezhad, Pilvi Riihilä, Jaakko S. Knuutila, Kristina Viikklepp, Sirkku Peltonen, Markku Kallajoki, Seppo Meri, Liisa Nissinen and Veli-Matti Kähäri**

Original uncropped Western blots for Figures 1B, 3B, 4B, 5A, 5C

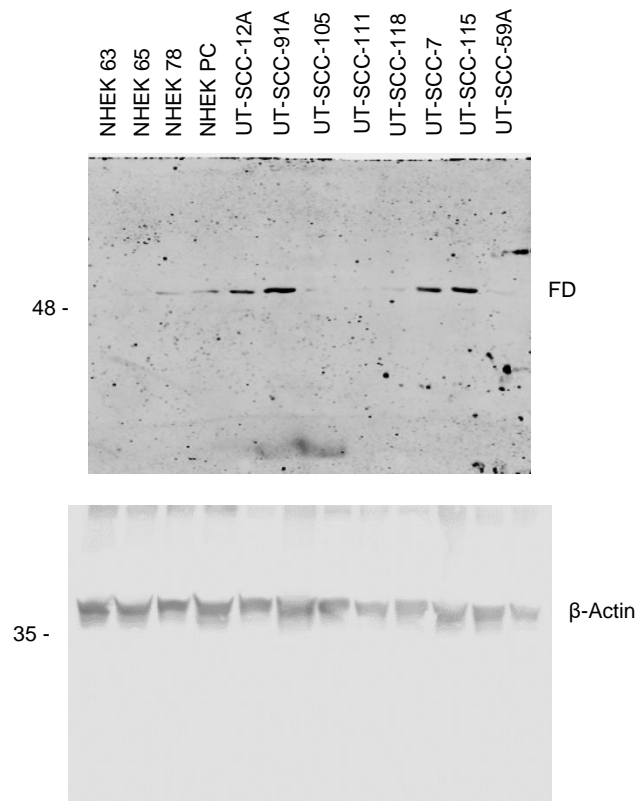

**Figure S1.** Expression of FD is up-regulated in cSCC tumor cells. B: FD levels in conditioned media of NHEKs and primary and metastatic cSCC cell lines were determined by Western blot analysis under nonreducing conditions.  $\beta$ -Actin levels in the cell lysates were determined as the sample controls. Migration positions of molecular weight markers in kDa are shown on the left.

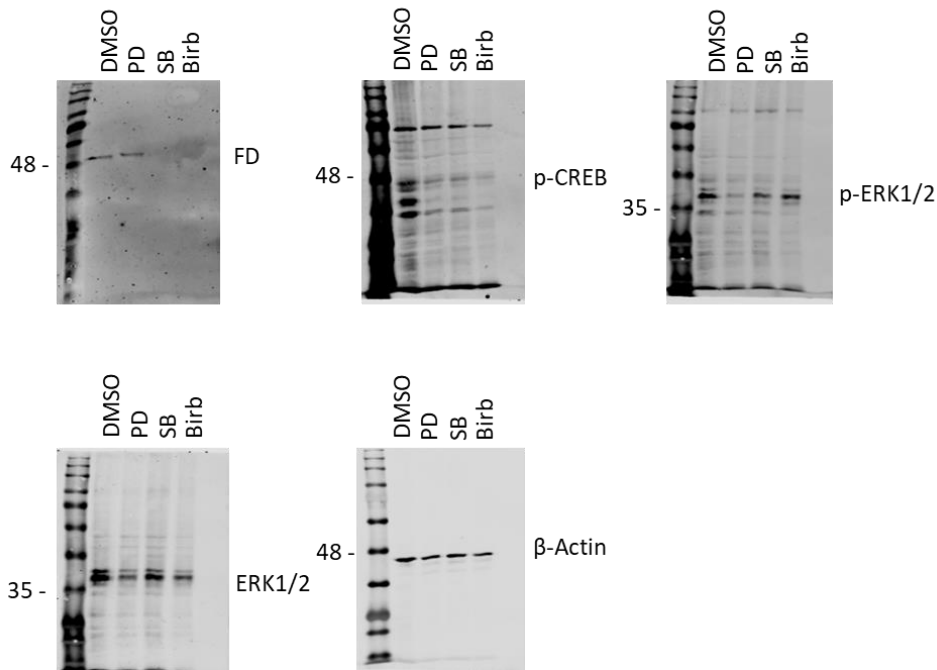

**Figure S2.** Up-regulation of FD expression in cSCC cells by IFN-  $\gamma$  and IL-1 $\beta$ , and p38 MAPK signaling pathway. B: cSCC cells (UT-SCC-12A) were treated with MEK1/2 inhibitor (PD98059; 30  $\mu$ M) or p38 inhibitor specific for p38 $\alpha$ / $\beta$  (SB203580; 10  $\mu$ M) or the inhibitor of all p38 isoforms  $\alpha$ ,  $\beta$ ,  $\gamma$  and  $\delta$  (BIRB796; 10  $\mu$ M) for 24 hours. The conditioned media were analyzed for FD levels by Western blot analysis. Cell lysates were analyzed for levels of phosphorylated CREB (p-CREB), phosphorylated ERK1/2 (p-ERK1/2) and ERK1/2 to verify the proper effects of SB203580, BIRB, and PD98059, respectively.  $\beta$ -actin was used as a sample and loading control. Migration positions of molecular weight markers in kDa are shown on the left.

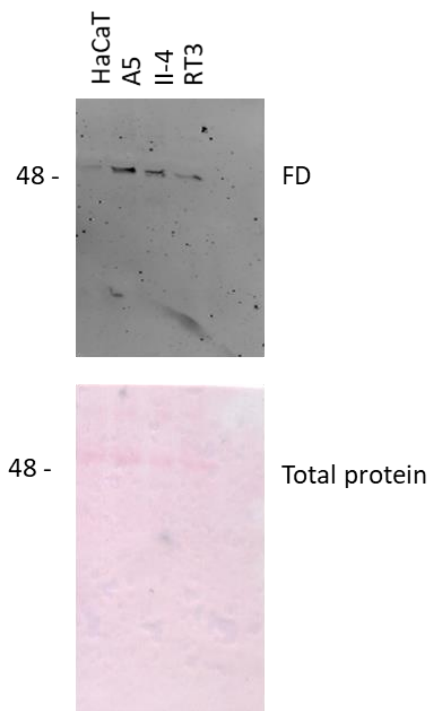

**Figure S3.** Regulation of FD expression in HaCaT and tumorigenic Ha-ras-Transformed HaCaT cell lines in culture. B: The expression of FD protein in conditioned media of HaCaT and Ha-ras-transformed HaCaT cell lines (A5, II-4, and RT3) was determined by Western blot analysis under nonreducing conditions. Equal total protein loading was controlled by Ponceau (0.2%) staining. Migration positions of molecular weight markers in kDa are shown on the left.

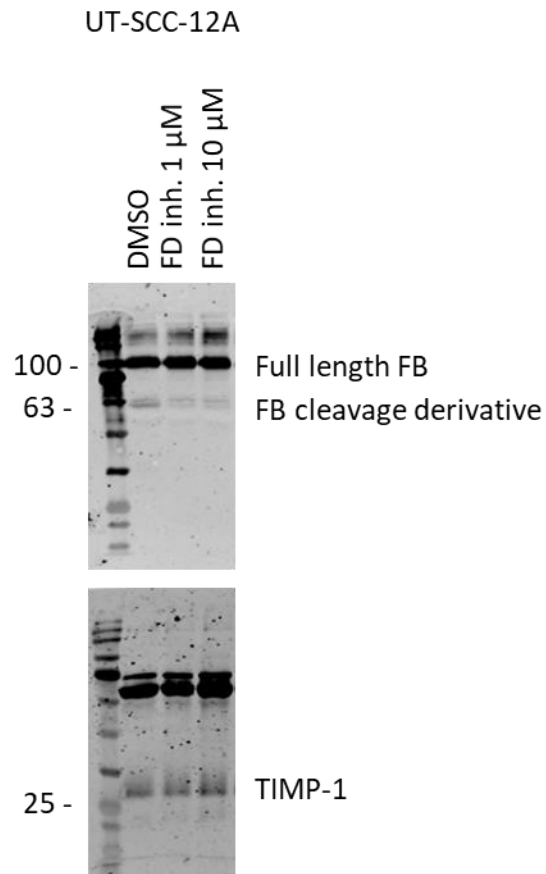

**Figure S4.** Targeted inhibition of FD suppresses proliferation of cSCC cells through blockade of ERK1/2 activation. A: cSCC cell cultures (UT-SCC-12A) were treated with small-molecule factor D inhibitor (Danicopan; ACH-4471) or DMSO as vehicle control for 24 h. The levels of complement factor B (FB) and its 60 kDa cleavage derivative in conditioned media of cSCC cells were determined by Western blot analysis. TIMP-1 was used as a loading control. Migration positions of molecular weight markers in kDa are shown on the left.

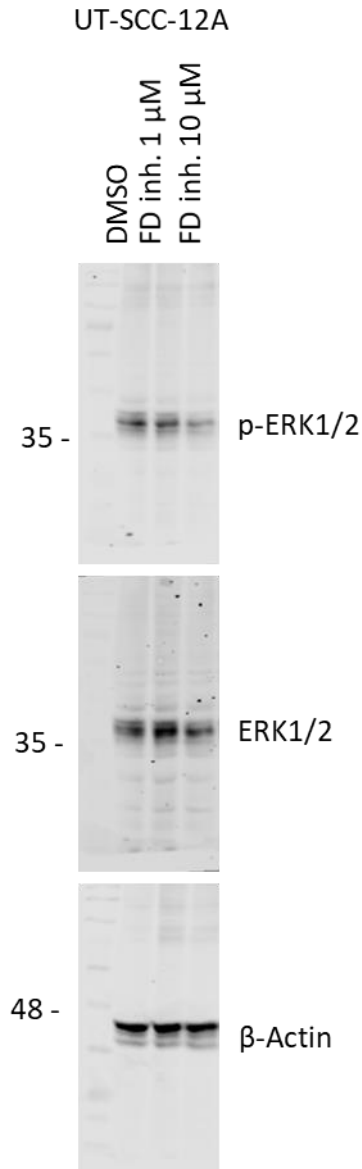

**Figure S5.** Targeted inhibition of FD suppresses proliferation of cSCC cells through blockade of ERK1/2 activation. C: Levels of phosphorylated ERK1/2 (p-ERK1/2) and ERK1/2 in small-molecule factor D inhibitor (Danicopan; ACH-4471) or DMSO vehicle treated cSCC cell lysates were determined by Western blot analysis 24 h following targeted FD inhibition.  $\beta$ -Actin was used as loading control. Migration positions of molecular weight markers in kDa are shown on the left.
